# Supplementary material
Source: MDPI journal article supplement (https://www.mdpi.com/2073-4433/12/11/1476)
Supplement: s1 [file s1]

# Temperature-Dependent Viscosity of Organic Materials Characterized by Atomic Force Microscope

Yiming Qin <sup>1,\*</sup>, Jianhuai Ye <sup>1,†</sup>, Paul Ohno <sup>1</sup>, Theodora Nah <sup>2</sup> and Scot T. Martin <sup>1,3</sup>

<sup>1</sup> School of Engineering and Applied Sciences, Harvard University, Cambridge, MA 02138, USA; yejh@sustech.edu.cn (J.Y.); pohno@fas.harvard.edu (P.O.); scot\_martin@harvard.edu (S.T.M.)

<sup>2</sup> School of Energy and Environment, City University of Hong Kong, Hong Kong 518057, China; theodora.nah@cityu.edu.hk

<sup>3</sup> Department of Earth and Planetary Sciences, Harvard University, Cambridge, MA 02138, USA

\* Correspondence: yiminq2@uci.edu

† Now at: School of Environmental Science and Engineering, Southern University of Science and Technology, Shenzhen 518055, China.

‡ Now at: Department of Chemistry, University of California Irvine, Irvine, CA 92697, USA.

**Table S1.** The density of the 10% w/w sucrose and DOP at the temperature range from 10 °C to 84 °C. Density for sucrose and DOP were obtained from Darros-Barbosa et al. [1], and De Lorenzi et al. [2], respectively.

| Temperature<br>(°C) | Density (kg m <sup>-3</sup> ) |         |
|---------------------|-------------------------------|---------|
|                     | 10% w/w Sucrose [1]           | DOP [2] |
| 10                  | 1040.15                       | -       |
| 15                  | 1038.11                       | 987.68  |
| 20                  | 1036.92                       | 983.75  |
| 25                  | 1035.54                       | 980     |
| 30                  | 1035.13                       | 976.21  |
| 35                  | -                             | 972.4   |
| 40                  | 1030.30                       | 964.96  |
| 45                  | -                             | 961.4   |
| 50                  | 1026.96                       | -       |
| 51.5                |                               | 954     |
| 60                  | 1021.93                       | -       |
| 64                  | -                             | 950.4   |
| 74                  | -                             | 943.9   |
| 79                  | -                             | 940.4   |
| 84                  | -                             | 936.8   |

## References

1. Darros-Barbosa, R.; Balaban, M.O.; Teixeira, A.A. Temperature and Concentration Dependence of Density of Model Liquid Foods. *Int. J. Food Prop.* **2003**, *6*, 195–214, doi:10.1081/JFP-120017815.
2. De Lorenzi, L.; Fermeglia, M.; Torriano, G. Density, Refractive Index, and Kinematic Viscosity of Diesters and Triesters. *J. Chem. Eng. Data* **1997**, *42*, 919–923, doi:10.1021/je970036f.
